# Supplementary material for: Risk of infections in multiple myeloma. A population-based study on 8,672 multiple myeloma patients diagnosed 2008-2021 from the Swedish Myeloma Registry
Source: PubMed Central journal article supplement — Haematologica. 2024 Jul 18;110(1):163–72. doi: 10.3324/haematol.2024.285645 (PMC11694133; doi:10.3324/haematol.2024.285645), 2024-07-18
Supplement: 2024_285645_BLIMARK_SUPPL.pdf [file 2024_285645_BLIMARK_SUPPL.pdf]

# Risk of infections in multiple myeloma. A population-based study on 8,672 multiple myeloma patients diagnosed 2008-2021 from the Swedish Myeloma Registry

Cecilie Hveding Blimark,<sup>1,2</sup> Kristina Carlson,<sup>3</sup> Christopher Day,<sup>2</sup> Sigrun Einarsdottir,<sup>2</sup> Gunnar Juliusson,<sup>4</sup> Moshtak Karma,<sup>5</sup> Dorota Knut-Bojanowska,<sup>6,1</sup> Gunnar Larfors,<sup>3</sup> Ingemar Turesson,<sup>7</sup> Mariana Villegas-Scivetti<sup>2</sup> and Ingigerdur Sverrisdóttir<sup>2,8</sup>

<sup>1</sup>Sahlgrenska Academy, University of Gothenburg, Gothenburg, Sweden; <sup>2</sup>Sahlgrenska University Hospital, Gothenburg, Sweden; <sup>3</sup>Uppsala University Hospital, Uppsala, Sweden;

<sup>4</sup>Lund University and Department of Hematology, Skåne University Hospital, Lund, Sweden;

<sup>5</sup>Södra Älvsborg Hospital, Borås, Sweden; <sup>6</sup>Uddevalla Hospital, Uddevalla, Sweden;

<sup>7</sup>Department of Hematology, Skåne University Hospital Malmö, Malmö, Sweden and

<sup>8</sup>Department of Medicine, University of Iceland, Reykjavik, Iceland

**Correspondence:** C.H. Blimark  
[cecilie.blimark@vgregion.se](mailto:cecilie.blimark@vgregion.se)

**Received:** April 12, 2024.

**Accepted:** July 8, 2024.

**Early view:** July 18, 2024.

<https://doi.org/10.3324/haematol.2024.285645>

©2025 Ferrata Storti Foundation

Published under a CC BY-NC license

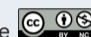

## Supplementary Material

| Absolute risk        | Myeloma | Controls |
|----------------------|---------|----------|
| Number of patients   | 8,672   | 34,561   |
| All infections       | 0.70    | 0.32     |
| Bacterial infections | 0.52    | 0.22     |
| Pneumonia            | 0.18    | 0.04     |
| Osteomyelitis        | 0.009   | 0.005    |
| Septicemia           | 0.2     | 0.04     |
| Pyelonephritis       | 0.04    | 0.03     |
| Cellulitis           | 0.016   | 0.007    |
| Meningitis           | 0.003   | 0.0003   |
| Endocarditis         | 0.007   | 0.002    |
| Viral infections     | 0.22    | 0.06     |
| CMV                  | 0.007   | 0.0003   |
| EBV                  | 0.001   | 0.0002   |
| Influenza            | 0.05    | 0.009    |
| Herpes Zoster        | 0.05    | 0.009    |
| Covid 19             | 0.03    | 0.02     |
| Herpes Simplex       | 0.02    | 0.003    |
| Fungal infections    | 0.08    | 0.02     |

Table S1: The absolute risk of specific infections, compared to age-matched controls

| Myeloma patients         | Age (years) | HR         | 95% CI    | p-value |
|--------------------------|-------------|------------|-----------|---------|
| All infections           | <65         | 1.00 (ref) |           |         |
|                          | 65-80       | 0.91       | 0.85-0.98 | 0.009   |
|                          | >=80        | 0.91       | 0.86-0.96 | <0.001  |
| All bacterial infections | <65         | 1.00 (ref) |           |         |
|                          | 65-80       | 1.04       | 0.96-1.13 | 0.4     |
|                          | >=80        | 1.11       | 1.04-1.19 | <0.001  |
| All viral infections     | <65         | 1.00 (ref) |           |         |
|                          | 65-80       | 0.72       | 0.64-0.80 | <0.001  |
|                          | >80         | 0.54       | 0.49-0.59 | <0.001  |
| All fungal infections    | <65         | 1.00 (ref) |           |         |
|                          | 65-80       | 0.73       | 0.60-0.88 | <0.001  |
|                          | >=80        | 0.61       | 0.52-0.71 | <0.001  |

Table S2: The risk of different types of infections in different age groups.

| Only myeloma patients:   | Calendar period | HR         | 95% CI    | p-value |
|--------------------------|-----------------|------------|-----------|---------|
| All infections           | 2008-2012       | 1.00 (ref) |           |         |
|                          | 2013-2017       | 1.06       | 1.00-1.11 | 0.037   |
|                          | 2018-2021       | 0.87       | 0.82-0.93 | <0.001  |
| All bacterial infections | 2008-2012       | 1.00 (ref) |           |         |
|                          | 2013-2017       | 0.99       | 0.93-1.05 | 0.7     |
|                          | 2018-2021       | 0.78       | 0.73-0.84 | <0.001  |
| All viral infections     | 2008-2012       | 1.00 (ref) |           |         |
|                          | 2013-2017       | 1.01       | 0.92-1.11 | 0.8     |
|                          | 2018-2021       | 0.85       | 0.76-0.96 | 0.014   |
| All fungal infections    | 2008-2012       | 1.00 (ref) |           |         |
|                          | 2013-2017       | 0.68       | 0.58-0.79 | <0.001  |
|                          | 2018-2021       | 0.59       | 0.48-0.72 | <0.001  |

Table S3: The risk of different types of infections in different calendar periods.
